# Supplementary material for: Synthesis, Characterization, and Impact of Water on the Stability of Postmodified Schiff Base Containing Metal–Organic Frameworks
Source: MDPI journal article supplement (doi:10.3390/inorganics11110432), 2023-11-08
Supplement: s1 [file s1]

# Synthesis, characterization, and impact of water on the stability of postmodified Schiff base containing metal-organic frameworks

Nikola D. Radnović <sup>1,\*</sup>, Chris S. Hawes <sup>2</sup>, Branko B. Kordić <sup>1</sup>, Milica G. Bogdanović <sup>1</sup>, Berta Barta Holló <sup>1</sup>, Mirjana M. Radanović <sup>1</sup>, Dušan Đ. Škorić <sup>1</sup>, Branislav D. Jović <sup>1</sup> and Marko V. Rodić <sup>1</sup>

<sup>1</sup> University of Novi Sad, Faculty of Sciences, Trg Dositeja Obradovića 3, 21000 Novi Sad, Serbia; nikola.radnovic@dh.uns.ac.rs (N.D.R.), branko.kordic@dh.uns.ac.rs (B.B.K.), milica.bogdanovic@dh.uns.ac.rs (M.G.B.), berta.hollo@dh.uns.ac.rs (B.B.H.), mirjana.lalovic@dh.uns.ac.rs (M.M.R.), dusan.skoric@dh.uns.ac.rs (D.Đ.Š.), branislav.jovic@dh.uns.ac.rs (B.D.J.), marko.rodic@dh.uns.ac.rs (M.V.R.);

<sup>2</sup> Keele University, School of Chemical and Physical Sciences, Keele ST5 5BG, United Kingdom; c.s.hawes@keele.ac.uk (C.S.H.);

\* Correspondence: nikola.radnovic@dh.uns.ac.rs (N.D.R.).

Table of content:

|                                                                 |                                |
|-----------------------------------------------------------------|--------------------------------|
| 1. Preparation of the ligands L <sup>1</sup> and L <sup>2</sup> | Scheme S1 and S2               |
| 2. NMR spectra of L <sup>1</sup> and L <sup>2</sup>             | Figure S1 and S2               |
| 3. FTIR spectra of L <sup>1</sup> , L <sup>2</sup> , 1a and 2a  | Figure S3–S5                   |
| 4. Thermogravimetric Analysis                                   | Figure S6 and S7               |
| 5. Gas Adsorption Figures and Data                              | Figures S8–S11 and Table S1-S2 |
| 6. UV-Vis spectra                                               | Figure S12                     |
| 7. EDS spectra and SEM micrographs of 1a and 2a                 | Figure S13 and S14             |
| 8. PXRD of 1a and 2a after exposure to water                    | Figure S15                     |

## 1. Preparation of the ligands L<sup>1</sup> and L<sup>2</sup>

### Synthesis of dimethyl-2-nitro-[1,1'-biphenyl]-4,4'-dicarboxylate (IIa)

To a solution of 4 g (14.8 mmol) of biphenyl-4,4'-dicarboxylic acid dimethyl ester in 40 mL of conc. sulfuric acid was added 1 mL (14.8 mmol) of 65% HNO<sub>3</sub> in 3 mL of conc. H<sub>2</sub>SO<sub>4</sub> dropwise at 15 °C under intense stirring. The reaction mixture was maintained at 15 – 20 °C for additional 2 h and then was carefully poured onto crushed ice. The precipitated solids were separated by filtration, washed with water, recrystallized from isopropanol, and air-dried. Yield 2.1 g, 45%.  $\nu_{\text{max}}/\text{cm}^{-1}$  (ATR): 3436 w, 2956 w, 1727 s, 1620 m, 1530 s, 1483 w, 1437 m, 1348 s, 1311 s, 1289 s, 1254 m, 1195 w, 1154 w, 1118 s, 1007 w, 982 w, 906 w, 861 w, 822 w, 757 m, 724 w, 703 w, 675 w, 486 w, 423 w.

### Synthesis of dimethyl 2-amino-[1,1'-biphenyl]-biphenyl-4,4'-dicarboxylate (IIIa)

Dimethyl-2-nitro-[1,1'-biphenyl]-4,4'-dicarboxylate (500 mg, 1.58 mmol) dissolved in THF (14.03 mL) was added to a mixture of 1 % Pd/C catalyst (54.6 mg) in chilled MeOH (7.24 mL). Ammonium formate (454.8 mg, 7.21 mmol) was added portion-wise, and the mixture was heated at 60 °C for 2 h. After cooling to room temperature, the Pd/C was removed by filtration through Celite and MeOH and THF were removed by rotary evaporation. The resulting precipitate was taken up in EtOAc (25 mL), then washed with H<sub>2</sub>O (3 × 25 mL), brine and dried over anhydrous Na<sub>2</sub>SO<sub>4</sub>. After removing the solvent by rotary evaporation, the crude product was recrystallized from EtOH. Yield 249 mg, 55%.  $\nu_{\text{max}}/\text{cm}^{-1}$  (ATR): 3458 w, 3365 w, 3061 w, 2952 w, 1704 s, 1622 m, 1604 m, 1574 w, 1558 w, 1497 w, 1453 m, 1399 m, 1334 w, 1299 m, 1274 s, 1259 s, 1247 s, 1188 m, 1152 w, 1114 m, 1103 m, 1021 w, 998 m, 975 w, 908 m, 867 w, 828 w, 798 w, 779 m, 759 s, 733 w, 704 m, 637 w, 578 w, 562 w, 530 w, 475 w, 460 m, 444 w, 421 w, 414 w, 406 w.

### Synthesis of 2-amino-[1,1'-biphenyl]-4,4'-dicarboxylic acid (L<sup>1</sup>)

A mixture of dimethyl 2-aminobiphenyl-4,4'-dicarboxylate (206 mg, 0.72 mmol) in THF (4 mL) and aq. 1 M KOH (4 mL) was heated for reflux for 16 hours after cooling to room temperature the THF was removed *in vacuo* and the solution was acidified with 1M HCl. The resulting precipitate was separated by filtration washed with water then methanol and air-dried. Yield 141 mg, 76%. <sup>1</sup>H NMR (400 MHz, DMSO-*d*<sub>6</sub>) 12.77 (br s, 2H, H7), 8.01 (d, *J* = 8.6 Hz, 2H, H6), 7.58 (d, *J* = 8.6 Hz, 2H, H5), 7.41 (d, *J* = 1.7 Hz, 1H, H4), 7.21 (dd, *J* = 7.8, 1.7, 7.8 Hz, 1H, H3), 7.12 (d, *J* = 7.8 Hz, 1H, H2), 5.16 (br s, 2H, H1).  $\nu_{\text{max}}/\text{cm}^{-1}$  (ATR): 3497 w, 3405 w, 2980 w, 2833 w, 2659 w, 2544 w, 1679 s, 1622 s, 1604 s, 1574 m, 1557 m, 1517 w, 1496 w, 1436 m, 1418 m, 1401 m, 1315 s, 1289 s, 1244 s, 1184 m, 1126 m, 1109 m, 1018 w, 1004 m, 907 m, 896 s, 826 m, 808 m, 757 s, 732 m, 707 m, 666 m, 634 m, 573 m, 537 s, 512 s, 467 s, 425 s, 406 m.

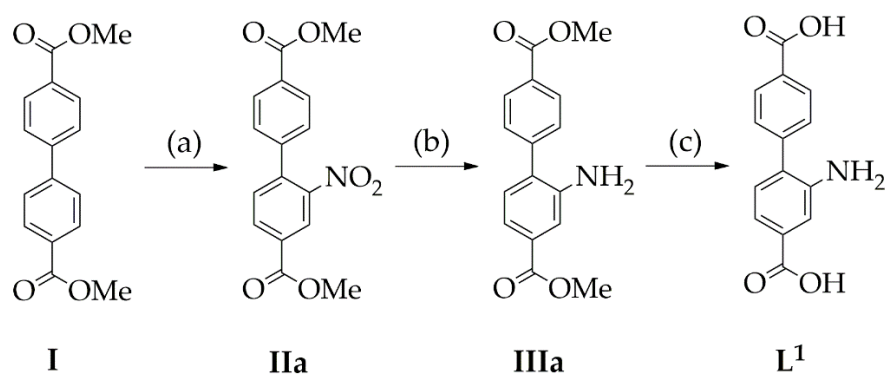

**Scheme S1.** Synthesis of **L<sup>1</sup>**. Reagents and conditions: (a)  $\text{ccH}_2\text{SO}_4$ , 65%  $\text{HNO}_3$  (1 eq), 15 °C, 2 h; (b) Pd/C, MeOH, THF, 60 °C, 2 h (c) 1 M KOH, THF/ $\text{H}_2\text{O}$ , reflux, 16 h, then 1M HCl.

### Synthesis of dimethyl-2,2'-dinitro-[1,1'-biphenyl]-4,4'-dicarboxylate (**IIb**)

To a solution of 4 g (14.8 mmol) of biphenyl-4,4'-dicarboxylic acid dimethyl ester in 40 mL of conc. sulfuric acid was added 2 mL (29.6 mmol) of 65%  $\text{HNO}_3$  in 3 mL of  $\text{cc H}_2\text{SO}_4$  dropwise at 15 °C under intense stirring. The reaction mixture was maintained at 15 – 20 °C for additional 2 h and then was carefully poured onto crushed ice. The precipitated solids were separated by filtration, washed with water, recrystallized from isopropanol, and air-dried. Yield 3.2 g, 60 %.  $\nu_{\text{max}}/\text{cm}^{-1}$  (ATR): 3430 w, 3095 w, 3007 w, 2956 w, 2849 w, 1722 s, 1616 m, 1567 w, 1525 s, 1481 m, 1450 w, 1435 m, 1343 s, 1306 s, 1284 s, 1251 m, 1195 m, 1157 m, 1113 s, 1097 s, 1005 m, 983 m, 964 m, 936 m, 916 m, 906 m, 897 m, 873 m, 860 s, 823 m, 774 s, 768 s, 762 s, 753 s, 724 s, 708 m, 694 s, 676 m, 654 m, 603 m, 560 w, 515 w, 483 m, 419 m.

### Synthesis of dimethyl 2, 2'-diamino-[1,1'-biphenyl]-4,4'-dicarboxylate (**IIIb**)

Dimethyl-2,2'-dinitro-[1,1'-biphenyl]-4,4'-dicarboxylate (0.5 g, 1.39 mmol) dissolved in THF (28 mL) was added to a mixture of 1 % Pd/C catalyst (109.9 mg) in chilled MeOH (14.4 mL). Ammonium formate (799.8 mg, 12.68 mmol) was added portion-wise, and the mixture was heated at 60 °C for 2 h. After cooling to room temperature, the Pd/C was removed by filtration through Celite and MeOH and THF were removed by rotary evaporation. The resulting precipitate was taken up in EtOAc (25 mL), then washed with  $\text{H}_2\text{O}$  ( $3 \times 25$  mL), brine and dried over anhydrous  $\text{Na}_2\text{SO}_4$ . After removing the solvent by rotary evaporation, the crude product was recrystallized from EtOH. Yield 358 mg, 86%.  $\nu_{\text{max}}/\text{cm}^{-1}$  (ATR): 3449 w, 3358 m, 3232 w, 3065 w, 2999 w, 2949 w, 2846 w, 2100 w, 1784 w, 1696 s, 1614 m, 1564 m, 1515 w, 1495 w, 1436 m, 1418 s, 1373 w, 1297 s, 1280 m, 1233 s, 1195 s, 1158 m, 1112 s, 1045 m, 999 m, 986 m, 893 m, 829 w, 795 m, 762 s, 750 s, 731 s, 669 m, 584 m, 555 s, 523 s, 487 m, 453 s, 425 s, 406 m, 402 m.

### Synthesis of 2,2'-diamino-[1,1'-biphenyl]-4,4'-dicarboxylic acid (**L<sup>2</sup>**)

A mixture of dimethyl 2,2'-diamino-[1,1'-biphenyl]-4,4'-dicarboxylate (350 mg, 1.17 mmol) in THF (11.7 mL) and aq. 2 M KOH (4 mL) was heated for reflux for 16 hours. After cooling to room temperature the THF was removed by rotary evaporation and the solution was acidified with 2 M HCl. The resulting yellow precipitate was separated by filtration washed with water then methanol

and air-dried. Yield 286 mg, 90%.  $^1\text{H}$  NMR (400 MHz,  $\text{DMSO-}d_6$ ) 12.68 (br s, 2H, H5), 7.43 (d,  $J = 1.7$  Hz, 2H, H4), 7.23 (dd,  $J = 9.5$  Hz, 2H, H3), 7.06 (d,  $J = 7.8$  Hz, 2H, H2), 4.94 (br s, 4H, H1).  $\nu_{\text{max}}/\text{cm}^{-1}$  (ATR): 3421 w, 3359 w, 2798 w, 2527 w, 2285 w, 1687 m, 1615 w, 1547 m, 1506 m, 1412 m, 1389 w, 1302 m, 1281 m, 1264 m, 1228 s, 1139 w, 1113 w, 920 m, 882 m, 837 m, 786 s, 764 s, 754 s, 715 m, 660 s, 610 m, 579 m, 554 s, 458 s, 430 s.

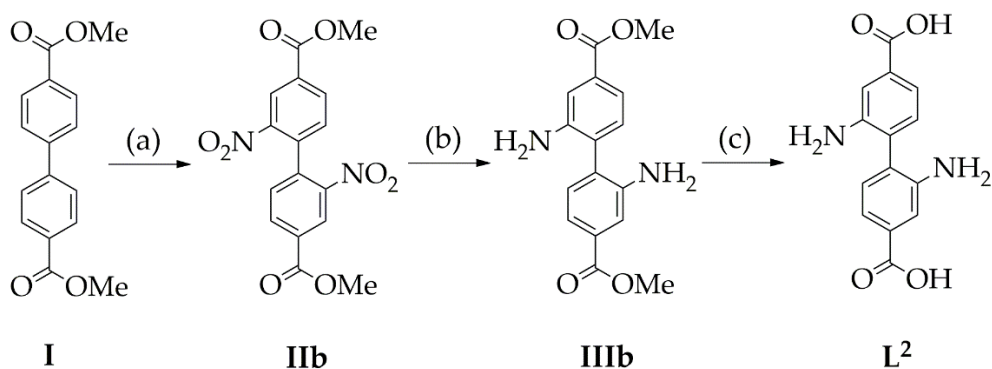

**Scheme S2.** Synthesis of **L<sup>2</sup>**. Reagents and conditions: (a) cc  $\text{H}_2\text{SO}_4$ , 65%  $\text{HNO}_3$  (2 eq), 15–20 °C, 2 h; (b) Pd/C, MeOH, THF, 60 °C, 2 h (c) 2M KOH, THF/ $\text{H}_2\text{O}$ , reflux, 16 h, then 2M HCl.

## 2. NMR Spectra of L<sup>1</sup> and L<sup>2</sup>

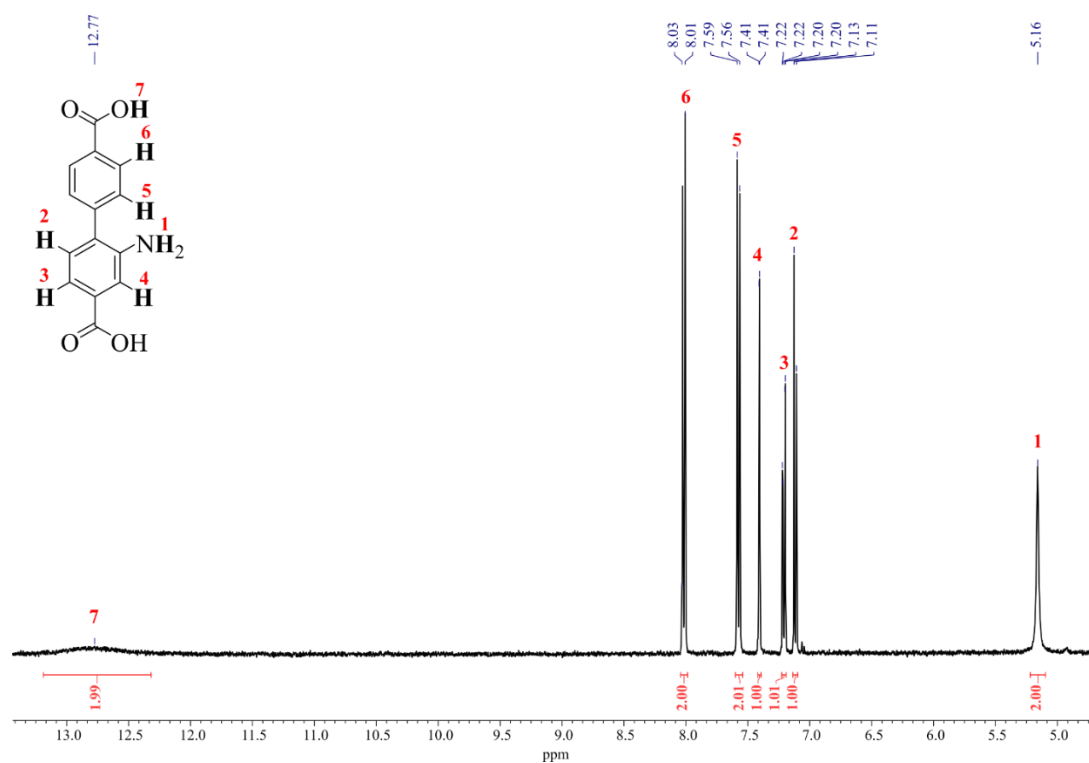

Figure S1. The <sup>1</sup>H NMR spectrum (400 MHz, DMSO-*d*<sub>6</sub>) of L<sup>1</sup>.

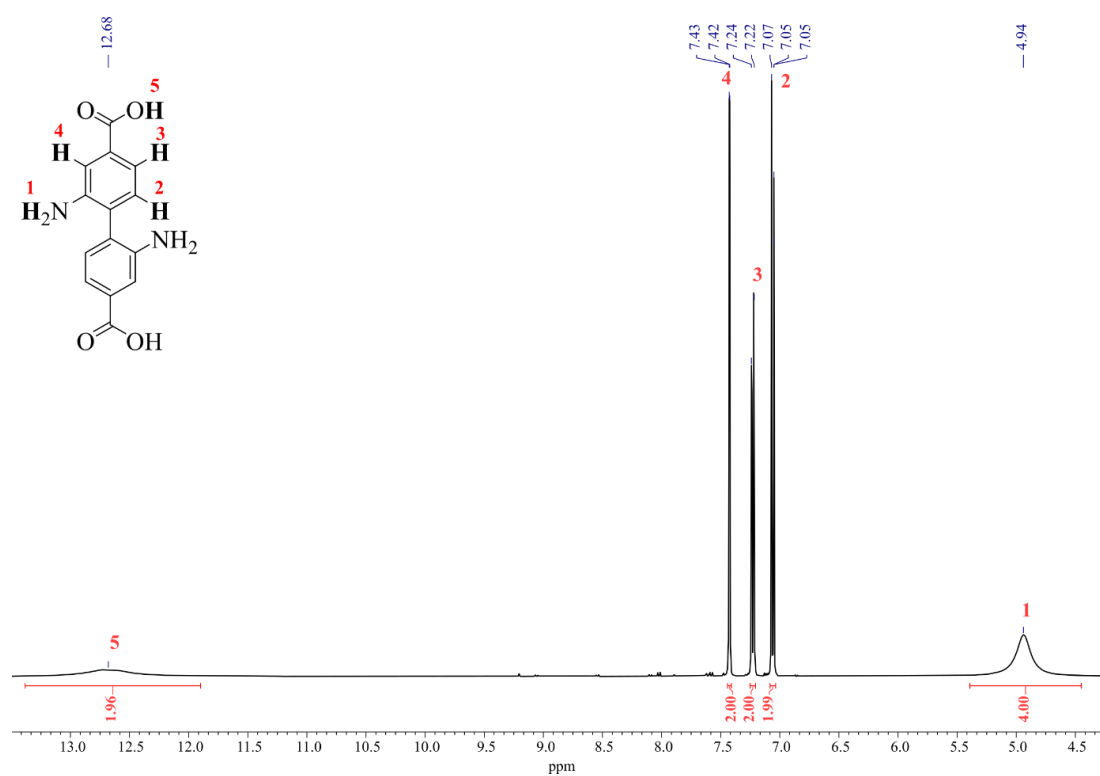

Figure S2. The <sup>1</sup>H NMR spectrum (400 MHz, DMSO-*d*<sub>6</sub>) of L<sup>2</sup>.

### 3. FTIR spectra of L<sup>1</sup> and L<sup>2</sup>

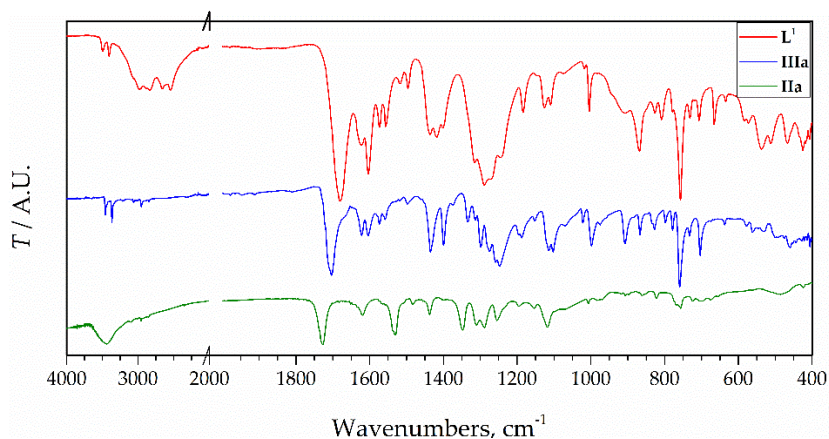

**Figure S3.** FT-IR Spectra of ligand (L<sup>1</sup>) and intermediates (IIa and IIIa) of three-step synthetic pathway for comparison.

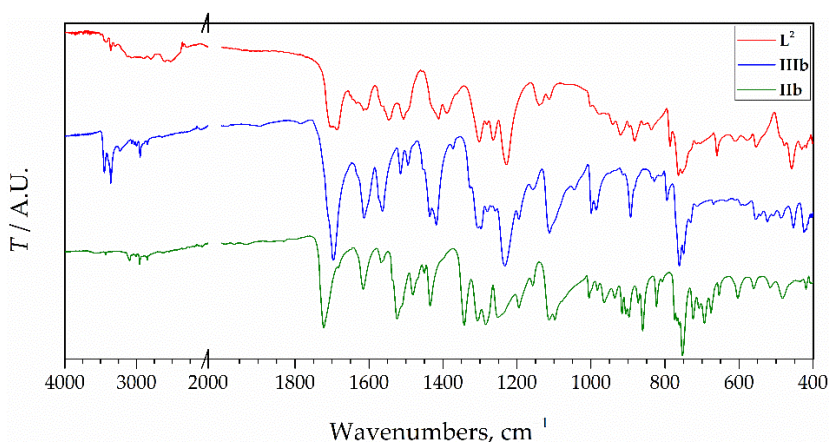

**Figure S4.** FT-IR Spectra of ligand (L<sup>2</sup>) and intermediates (IIb and IIIb) of three-step synthetic pathway for comparison.

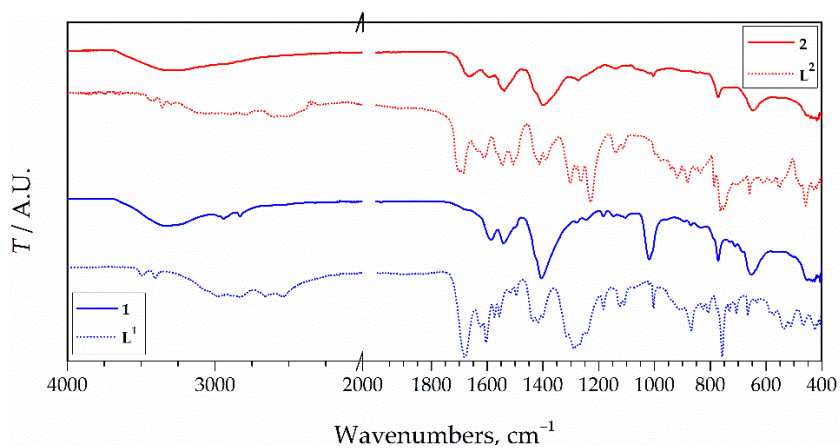

**Figure S5.** FT-IR spectra of 1, 2 and corresponding ligands for comparison.



#### 4. Thermogravimetric Analysis

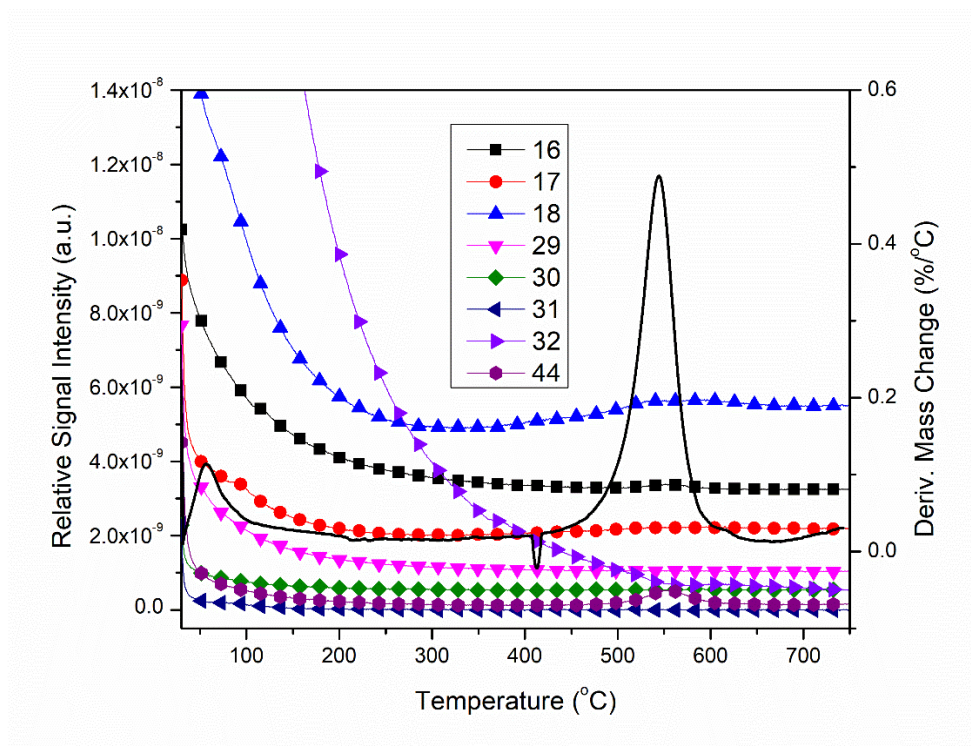

**Figure S6.** TG-MS signals of fragments evolved from **1a** during heating in argon.

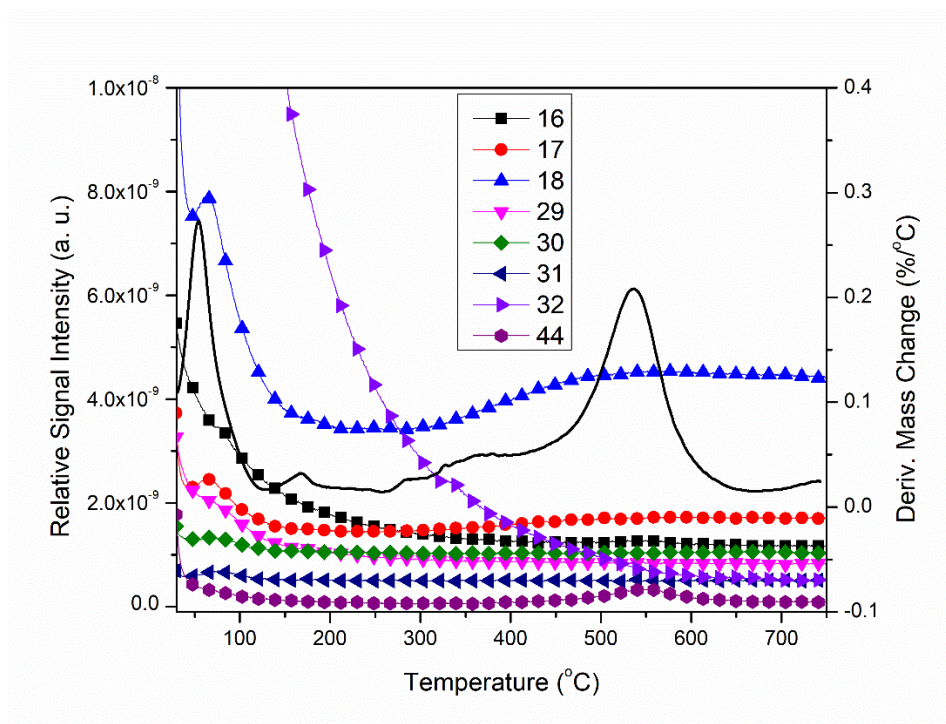

**Figure S7.** TG-MS signals of fragments evolved from **2a** during heating in argon.

## 5. Gas Adsorption Figures and Data

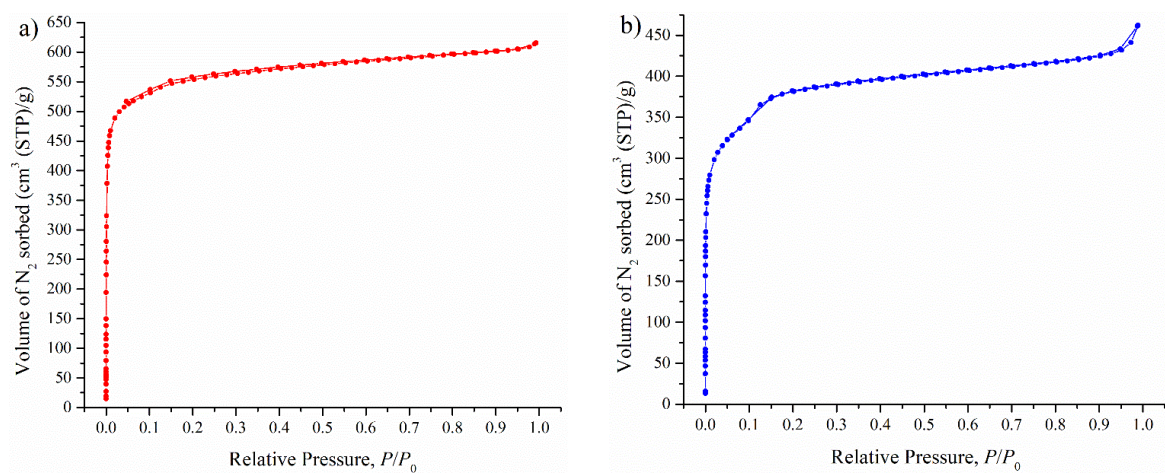

**Figure S8.**  $N_2$  sorption isotherms for **1a** (a) and **2a** (b).

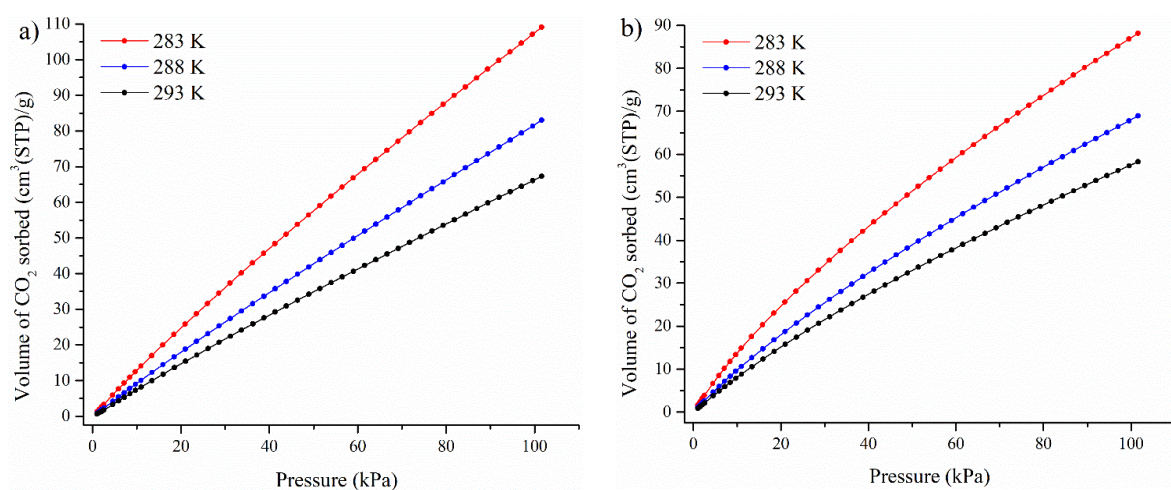

**Figure S9.**  $CO_2$  sorption isotherms for **1a** (a) and **2a** (b) at 283, 288 and 293K.



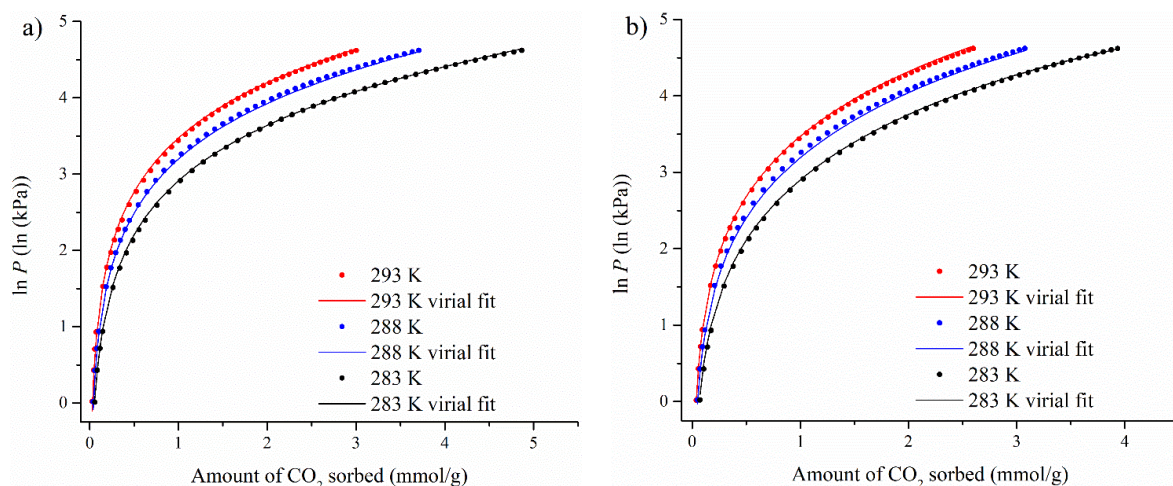

**Figure S10.** Virial fit of CO<sub>2</sub> adsorption data for **1a** (a) and **2a** (b) at 283, 288 and 293K.

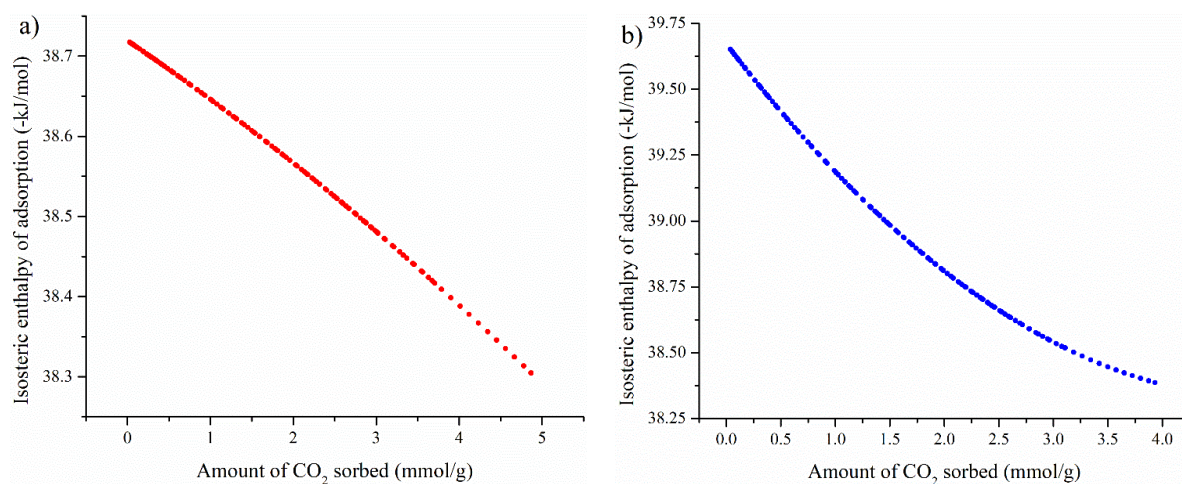

**Figure S11.** Isosteric enthalpy of adsorption obtained from virial fit for **1a** (a) and **2a** (b).

**Table S1.** gas sorption investigation data.

| Parameter                                                      | <b>1a</b> | <b>2a</b> |
|----------------------------------------------------------------|-----------|-----------|
| BET surface [m <sup>2</sup> /g]                                | 2091      | 1381      |
| Average pore size [Å]                                          | 12.7      | 8.2       |
| Pore volume [cm <sup>3</sup> /g]                               | 0.892     | 0.623     |
| CO <sub>2</sub> uptake at 293 K and 1 atm [cm <sup>3</sup> /g] | 67.1      | 58.2      |
| Isosteric enthalpy of CO <sub>2</sub> adsorption [– kJ/mol]    | 38.6      | 39.0      |

**Table S2.** Obtained virial parameters.

| Parameter      | 1a        | 2a        |
|----------------|-----------|-----------|
| A <sub>0</sub> | – 4656.86 | – 4771.36 |
| A <sub>1</sub> | 8.4240    | 64.7921   |
| A <sub>2</sub> | 0.3742    | – 6.4849  |
| B <sub>0</sub> | 19.3296   | 19.5485   |

## 6. UV-Vis spectra

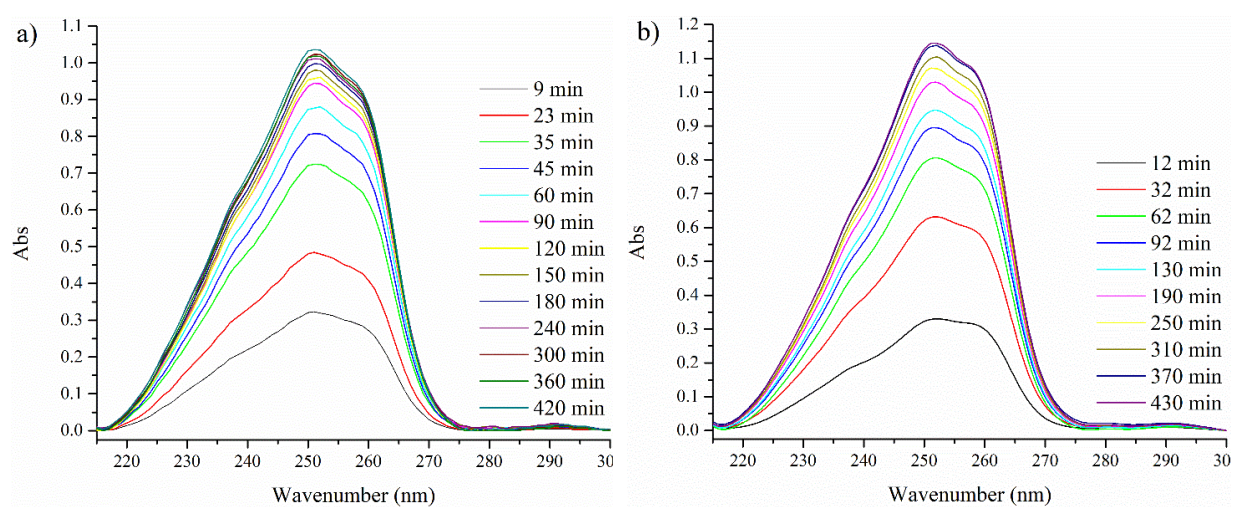

**Figure S12.** UV spectra of water samples containing **1a** (a) and **2a** (b) collected at different time intervals.

## 7. EDS spectra and SEM micrographs of 1a and 2a

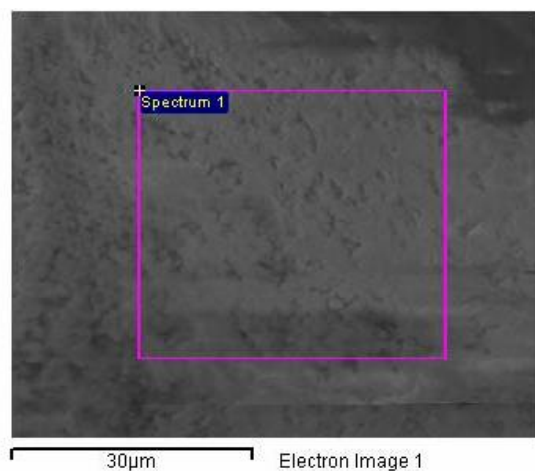

(a)

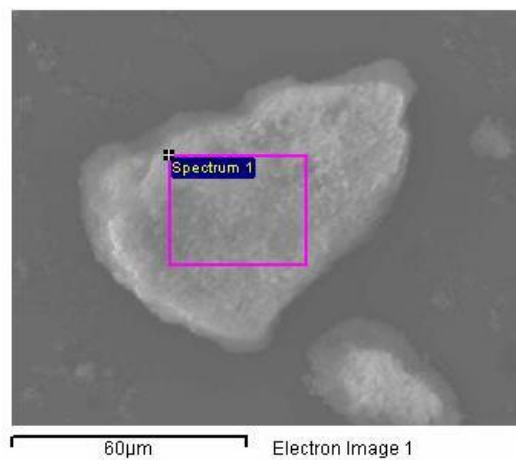

(b)

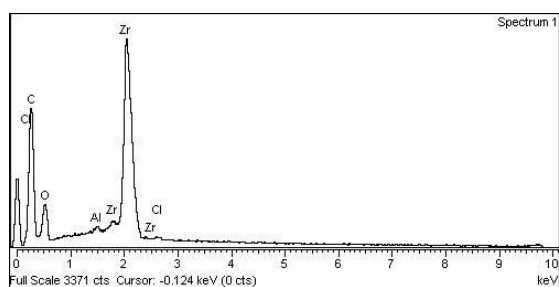

(c)

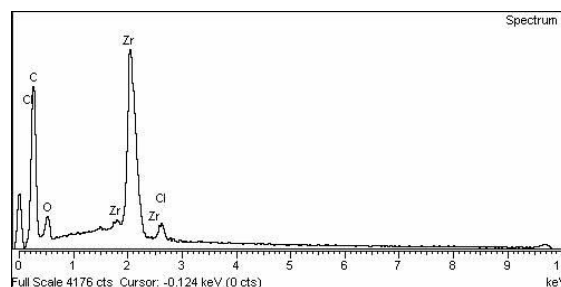

(d)

**Figure S13.** Selected surfaces of **1a** (a) and **2a** (b) for EDS analysis and their spectra (c and d).

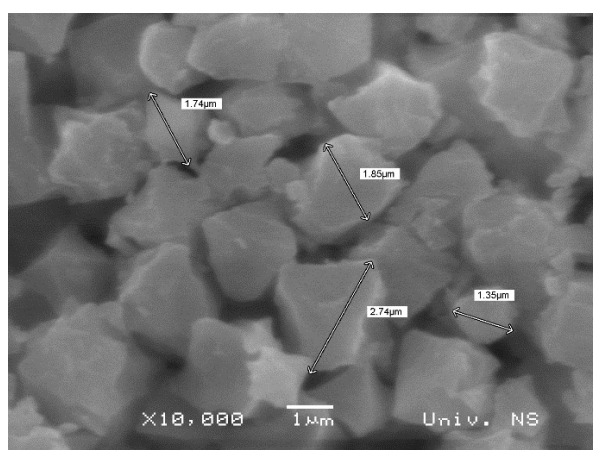

(a)

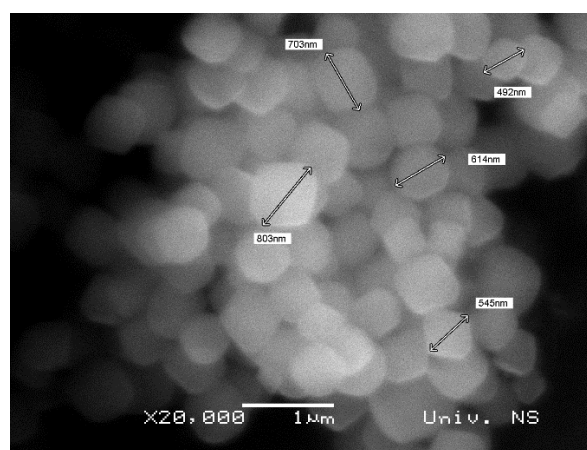

(b)

**Figure S14.** SEM micrographs of **1a** (a) and **2a** (b) that show the variety of crystal sizes.

## 8. PXRD of 1a and 2a after exposure to water

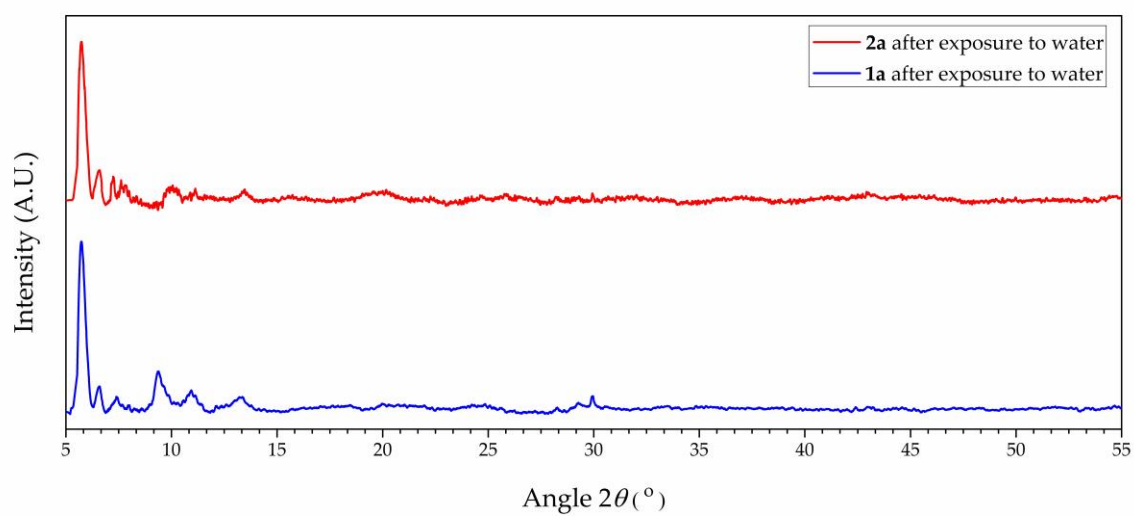

**Figure S15.** X-ray powder diffraction data for **1a** and **2a** after exposure to water.
